# Supplementary material for: Controlling screw dislocation evolution towards highly homogeneous quasi-two-dimensional (BA)2(MA)n−1PbnI3n+1 single crystals for high-response photo-detectors
Source: Royal Society of Chemistry journal article supplement (doi:10.1039/d1tc06084h), 2022-01-01
Supplement: d1tc06084h1.pdf [file d1tc06084h1.pdf]

## Supporting Information

### Controlling Screw Dislocation Evolutions towards High Homogeneous Quasi-Two-Dimensional $(\text{BA})_2(\text{MA})_{n-1}\text{Pb}_n\text{I}_{3n+1}$ Single Crystals for High Response Photo-detectors

Qing Yao<sup>1</sup>, Jie Zhang<sup>1</sup>, Kaiyu Wang<sup>1</sup>, Changqian Li<sup>1</sup>, Chenyu Shang<sup>1</sup>, Haiqing Sun<sup>1</sup>,  
Weiwei Zhang<sup>1</sup>, Tianliang Zhou<sup>2,\*</sup>, Huiling Zhu<sup>1,\*</sup>, Jianxu Ding<sup>1,\*</sup>

1. College of Materials Science and Engineering, Shandong University of Science and Technology, Qingdao 266590, China;
2. College of Materials, Xiamen University, Xiamen 361005, China;

#### Corresponding authors:

**Tianliang Zhou**- College of Materials, Xiamen University, Xiamen 361005, China;  
orcid.org/ 0000-0002-0086-084X; [Email: bible2@163.com](mailto:bible2@163.com)

**Huiling Zhu**- *College of Materials Science and Engineering, Shandong University of Science and Technology, Qingdao 266590, China; orcid.org/0000-0002-5698-1026;*  
[Email: skdzh1@sdust.edu.cn](mailto:skdzh1@sdust.edu.cn)

**Jianxu Ding**- *College of Materials Science and Engineering, Shandong University of Science and Technology, Qingdao 266590, China; orcid.org/0000-0001-5662-2683;*  
[Email: dingjianxu@sdust.edu.cn](mailto:dingjianxu@sdust.edu.cn)

## 1. Descriptions of the raw materials purity

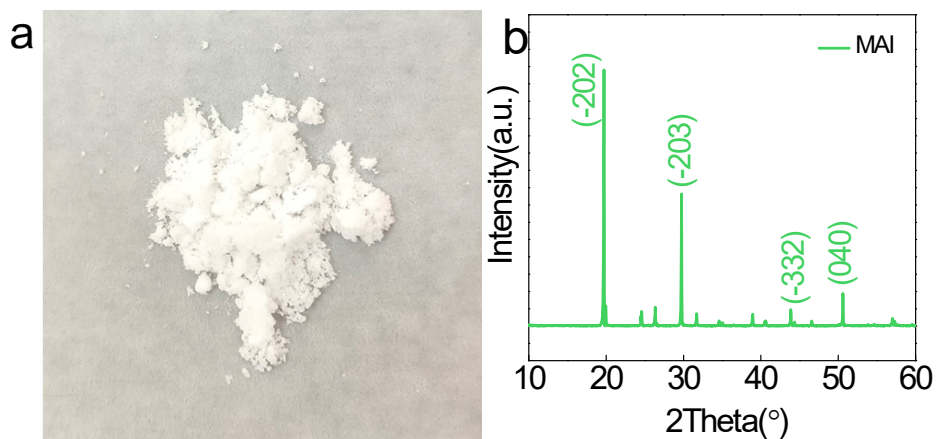

**Figure S1 (a-b) Photograph and XRD pattern of MAI powders.**

The synthesis process of MAI powders: Methylamine  $\text{CH}_3\text{NH}_2$  solution and hydroiodic acid HI are reacted in an ice-water bath at a volume ratio of 6:5. After reacting for 4 hours, the mixed solution was sealed at  $60^\circ\text{C}$  for 24 hours. The crystallization of MAI is achieved by evaporating water at  $60^\circ\text{C}$  to obtain white MAI powder (Figure S1a). Figure S1b shows the XRD pattern of MAI powder.

## 2. Photographs of BMPI solution preparation

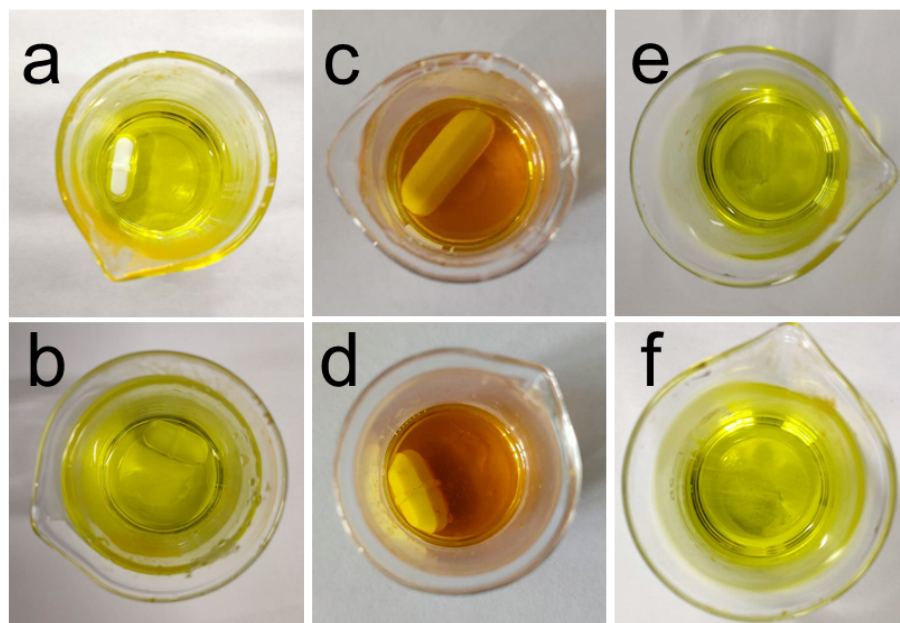

**Figure S2 (a-b) Photographs of I solution; (c-d) Photographs of II solution; (e-f) Photographs of crystal growth solution.**

### 3. Photographs of BMPI perovskite SCs growth

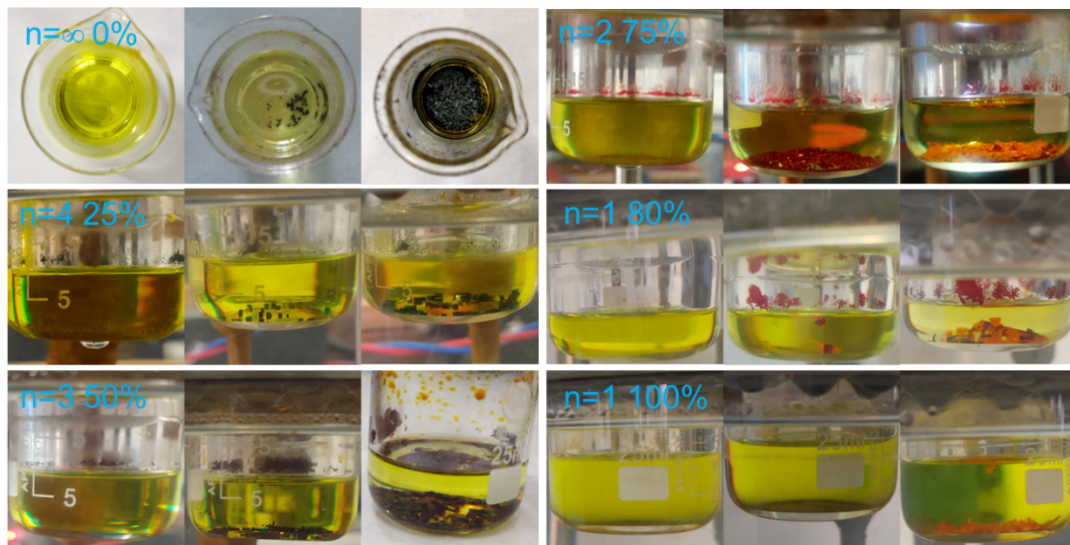

Figure S3 Photographs of BMPI ( $n=1-4$  and  $\infty$ ) SCs growth.

#### 4. Crystal data for BMPI ( $n=1-4$ and $\infty$ ) SCs at 293K

Table S1. Crystal data for BMPI ( $n=1-4$  and  $\infty$ ) SCs at 293K

| n values                    | $n=1$        | $n=2$        | $n=3$        | $n=4$        | $n=\infty$ |
|-----------------------------|--------------|--------------|--------------|--------------|------------|
| Crystal system              | orthorhombic | orthorhombic | orthorhombic | orthorhombic | tetragonal |
| Space group                 | Pbca         | Cc2m         | C2cb         | Cc2m         | I4/mcm     |
| Color                       | orange       | red          | dark red     | black        | black      |
| a(Å)                        | 8.8555(8)    | 8.9470(4)    | 8.9275(6)    | 8.9274(4)    | 8.8392(3)  |
| b(Å)                        | 8.6810(8)    | 39.347(2)    | 51.959(4)    | 64.383(3)    | 8.8392(3)  |
| c(Å)                        | 27.602(3)    | 8.8589(6)    | 8.8777(6)    | 8.8816(4)    | 12.6948(5) |
| $\alpha=\beta=\gamma$ (deg) | 90           | 90           | 90           | 90           | 90         |
| Volume(Å <sup>3</sup> )     | 2121.89(4)   | 3118.67(3)   | 4118.04(5)   | 5104.9(4)    | 991.86(6)  |
| Z                           | 8            | 4            | 4            | 4            | 4          |
| References                  | [1]          | [2]          | [2]          | [2]          | [3]        |

5. 2D AFM image of heterojunction structures on the (020) surface of  $\text{BA}_2\text{MA}_3\text{Pb}_4\text{I}_{13}$  SCs

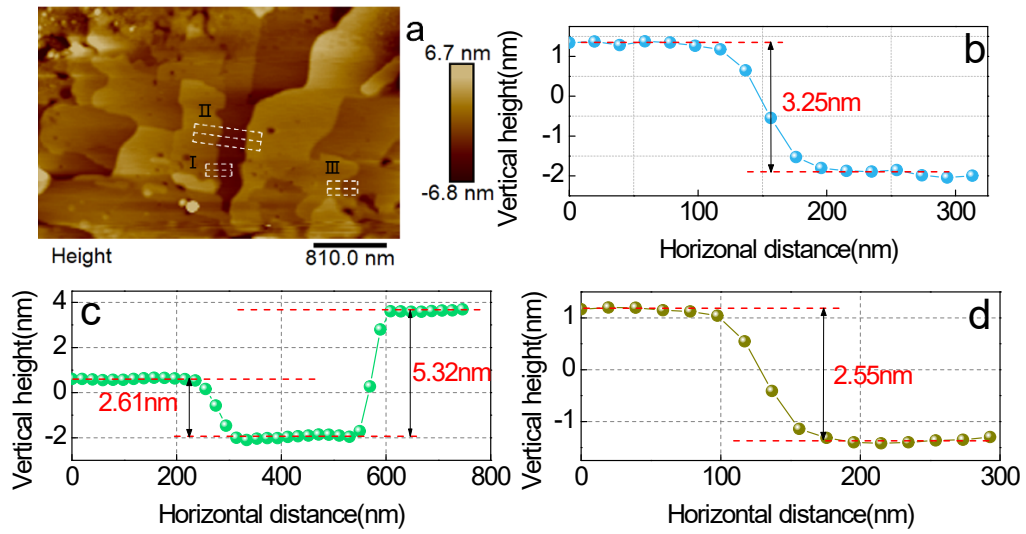

Figure S4. (a) 2D AFM images of heterojunction structures of  $\text{BA}_2\text{MA}_3\text{Pb}_4\text{I}_{13}$  SCs; (b-d) step heights.

## 6. 2D AFM image of BA<sub>2</sub>PbI<sub>4</sub> SCs

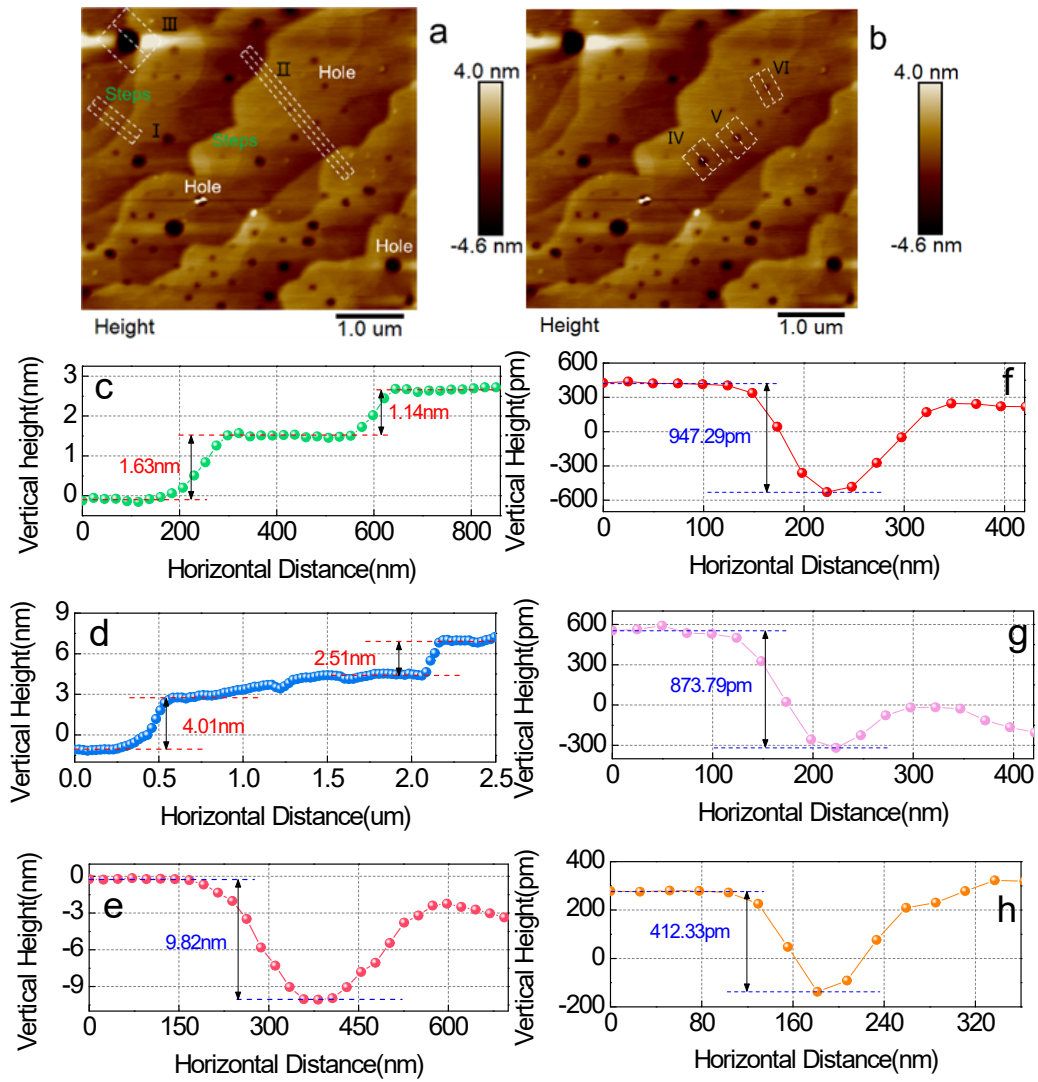

Figure S5. (a-b) 2D AFM image of growth steps and holes on (002) surface of BA<sub>2</sub>PbI<sub>4</sub>

(BA=20%) SCs; (c-h) step heights and hole depth files of the measured steps and holes.

7. Spiral dislocation diagram of BMPI ( $n=2-3$ ) SCs

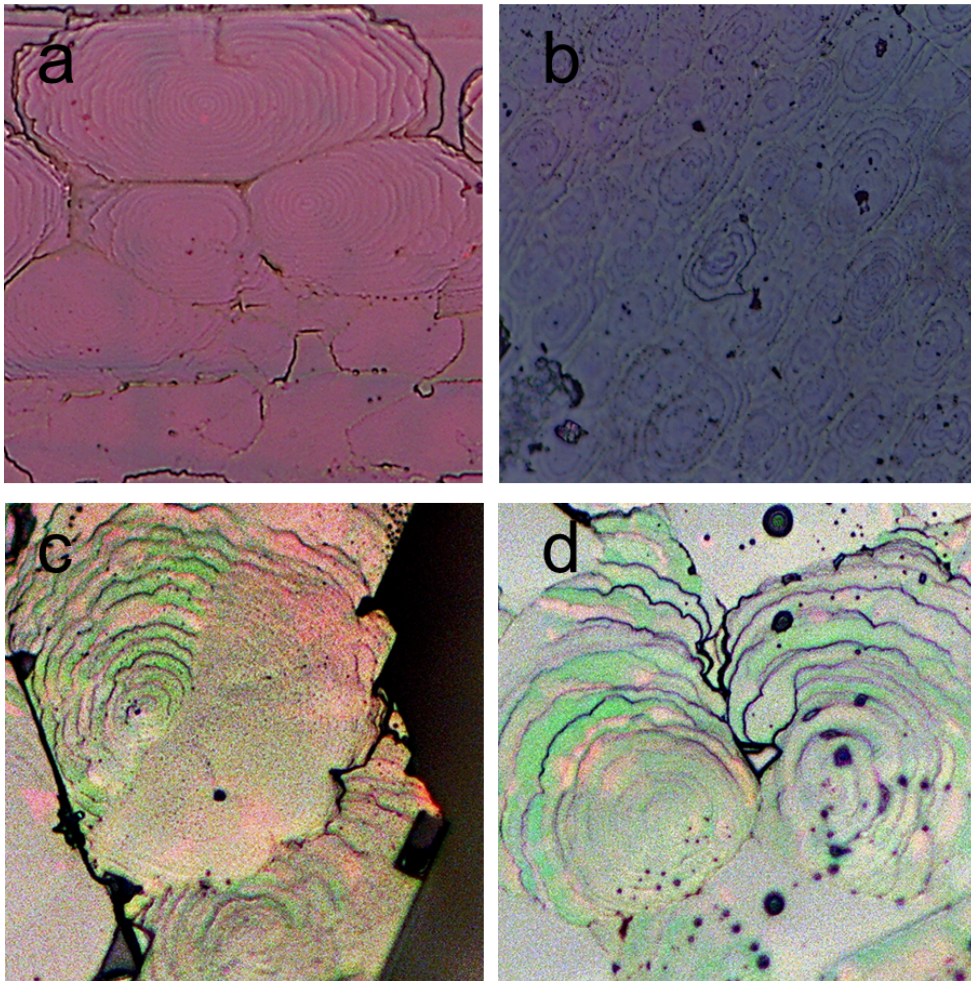

Figure S6. (a-d) Spiral dislocation diagram of BMPI ( $n=2-3$ ) SCs (magnification: 50).





## 9. Length and width of screw dislocation steps

Table S2. Length and width of screw dislocation steps

| number  | Width ( $\mu\text{m}$ ) | Length ( $\mu\text{m}$ ) |
|---------|-------------------------|--------------------------|
| 1       | 2.05                    | 2.25                     |
| 2       | 2.16                    | 1.72                     |
| 3       | 2.37                    | 1.79                     |
| 4       | 2.05                    | 2.25                     |
| 5       | 1.73                    | 1.72                     |
| 6       | 1.51                    | 1.62                     |
| 7       | 1.51                    | 1.40                     |
| 8       | 1.83                    | 1.62                     |
| 9       | 1.62                    | 1.96                     |
| 10      | 1.51                    | 1.62                     |
| 11      | 1.51                    | 1.29                     |
| 12      | 1.62                    | 1.83                     |
| 13      | 1.62                    | 1.72                     |
| 14      | 1.62                    | 1.79                     |
| Average | 1.765                   | 1.797                    |

## References

- (1) A. M. Sanni, S. Lavan, A. Avramenko, F. A. Rabuffetti, L. Suescun, A. Rury, Room-Temperature Broadband Light Emission from Hybrid Lead Iodide Perovskite-Like Quantum Wells: Terahertz Spectroscopic Investigation of Metastable Defects, *J. Phys. Chem. Lett.*, **2019**, *10*, 1653-1662.
- (2) C. C. Stoumpos, D. H. Cao, D. J. Clark, J. Young, J. M. Rondinelli, J. I. Jang, J. T. Hupp, M. G. Kanatzidis, Ruddlesden–Popper Hybrid Lead Iodide Perovskite 2D Homologous Semiconductors, *Chem. Mater.*, **2016**, *28*, 2852-2867.
- (3) P. S. Whitfield, N. Herron, W. E. Guise, K. Page, Y. Q. Cheng, I. Milas, M. K. Crawford, Structures, Phase Transitions and Tricritical Behavior of the Hybrid Perovskite Methyl Ammonium Lead Iodide, *Sci. Rep.*, **2016**, *6*, 35685.
